# Supplementary material for: The high yielding synthesis of pillar[5]arenes under Friedel–Crafts conditions explained by dynamic covalent bond formation
Source: Royal Society of Chemistry journal article supplement (doi:10.1039/c2cc16795f), 2011-12-03
Supplement: c2cc16795f.pdf [file c2cc16795f.pdf]

## Supplementary Information

## **The high yielding synthesis of pillar[5]arene under Friedel-Crafts conditions explained by dynamic covalent bond formation**

Michel Holler, Nicolas Allenbach, Jordan Sonet and Jean-François Nierengarten\*

Laboratoire de Chimie des Matériaux Moléculaires, Université de Strasbourg et CNRS (UMR 7509), Ecole Européenne de Chimie, Polymères et Matériaux, 25 rue Becquerel, 67087 Strasbourg (France).

## Experimental section

**General:** Reagents and solvents were purchased as reagent grade and used without further purification.  $\text{CH}_2\text{Cl}_2$  was distilled over  $\text{CaH}_2$ . Compounds **6**<sup>[1]</sup> and **10**<sup>[1]</sup> were prepared according to previously reported procedures. All reactions were performed in standard glassware under an inert Ar or  $\text{N}_2$  atmosphere. Evaporation and concentration were done at water aspirator pressure and drying in vacuo at  $10^{-2}$  Torr. Column chromatography: silica gel 60 (230-400 mesh, 0.040-0.063 mm) was purchased from E. Merck. Thin Layer Chromatography (TLC) was performed on glass sheets coated with silica gel 60 F<sub>254</sub> purchased from E. Merck, visualization by UV light. NMR spectra were recorded on a Bruker AC 300 or AC 400 with solvent peaks as reference. Elemental analysis were performed by the analytical service at the Laboratoire de Chimie de Coordination (Toulouse, France). MALDI-TOF mass spectra were obtained on a Bruker ULTRAFLEX TOF/TOF mass spectrometer with a dithranol matrix.

### Cyclooligomerization of compound **1**.

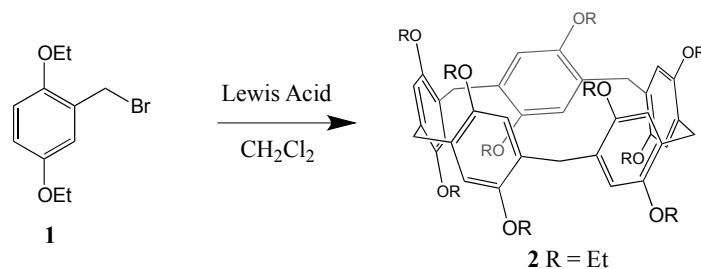

The appropriate Lewis acid (see Table S1) was added in several portions (over 1 h) to a stirred 11 mM solution of **1** in dry  $\text{CH}_2\text{Cl}_2$  at room temperature. The reaction mixture turned progressively dark green. After 12 h,  $\text{H}_2\text{O}$  was added. The aqueous layer was extracted with  $\text{CH}_2\text{Cl}_2$  (3 x) and the combined organic layers dried ( $\text{MgSO}_4$ ), filtered and concentrated. Column chromatography ( $\text{SiO}_2$ , cyclohexane/ $\text{CH}_2\text{Cl}_2$  1:1) followed by recrystallization

<sup>1</sup> M. J. Gomez-Escalonilla, F. Langa, J.-M. Rueff, L. Oswald and J.-F. Nierengarten, *Tetrahedron Lett.*, 2002, **43**, 7507-7511.

(CH<sub>3</sub>CN) gave **2**. The yields are summarized in Table S1. The analytical data were identical to those reported in the literature for compound **2**.<sup>[2]</sup>

**Table S1.**

| Reagents                                 |                   | Product                   |
|------------------------------------------|-------------------|---------------------------|
| Lewis Acid                               | Compound 1        | (isolated yield)          |
| AlCl <sub>3</sub><br>(616 mg, 4.62 mmol) | 400 mg, 1.54 mmol | <b>2</b><br>(194 mg, 71%) |
| ZnCl <sub>2</sub><br>(470 mg, 3.46 mmol) | 300 mg, 1.15 mmol | <b>2</b><br>(86 mg, 42%)  |
| FeCl <sub>3</sub><br>(320 mg, 2.0 mmol)  | 178 mg, 0.68 mmol | <b>2</b><br>(47 mg, 39%)  |

**Cyclization reaction from compounds 3 and 4.**

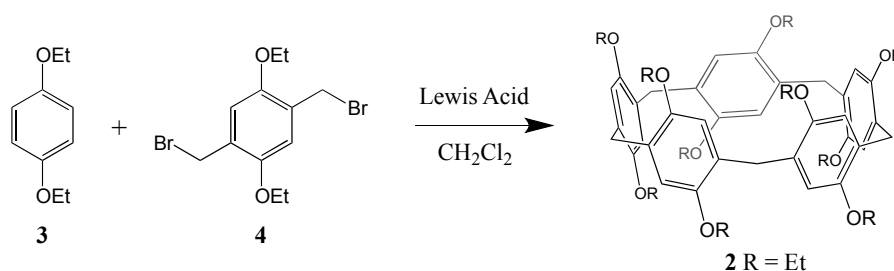

The appropriate Lewis acid (see Table S2) was added in several portions (over 1 h) to a stirred 11 mM solution of **3** (1 equiv.) and **4** (1 equiv.) in dry CH<sub>2</sub>Cl<sub>2</sub> at room temperature. The reaction mixture turned progressively dark green. After 12 h, H<sub>2</sub>O was added. The aqueous layer was extracted with CH<sub>2</sub>Cl<sub>2</sub> (3 x) and the combined organic layers dried (MgSO<sub>4</sub>), filtered and concentrated. Column chromatography (SiO<sub>2</sub>, cyclohexane/CH<sub>2</sub>Cl<sub>2</sub> 1:1) followed by recrystallization (CH<sub>3</sub>CN) gave **2**. The yields are summarized in Table S2. The analytical data were identical to those reported in the literature for compound **2**.<sup>[2]</sup> As a typical example, the MALDI-TOF mass spectrum of the cyclization product isolated from the reaction of **3** and **4** with AlCl<sub>3</sub> as a Lewis acid is depicted in Fig. S1.

<sup>2</sup> T. Ogoshi, T. Aoki, K. Kitajima, S. Fujinami, T. Yamagishi and Y. Nakamoto, *J. Org. Chem.*, 2011, **66**, 328-331.

**Table S2.**

| Lewis acid                              |  | Compound 3       | Compound 4       | Product<br>(isolated yield) |
|-----------------------------------------|--|------------------|------------------|-----------------------------|
| AlCl <sub>3</sub><br>(400 mg, 3.0 mmol) |  | 182 mg, 1.1 mmol | 400 mg, 1.1 mmol | <b>2</b><br>(239 mg, 61%)   |
| ZnCl <sub>2</sub><br>(400 mg, 2.9 mmol) |  | 182 mg, 1.1 mmol | 400 mg, 1.1 mmol | <b>2</b><br>(217 mg, 55%)   |
| FeCl <sub>3</sub><br>(490 mg, 3.0 mmol) |  | 182 mg, 1.1 mmol | 400 mg, 1.1 mmol | <b>2</b><br>(245 mg, 63%)   |

**Cyclization reaction from compounds 4 and 6.**

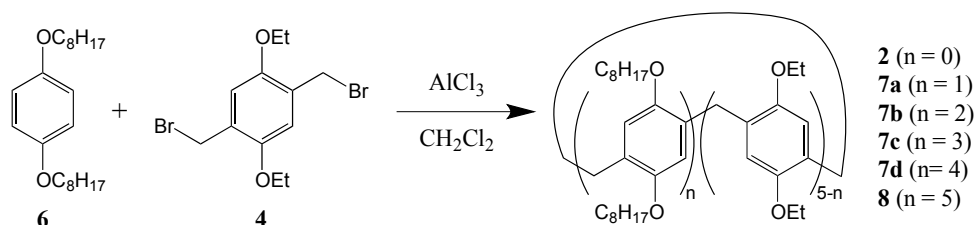

AlCl<sub>3</sub> (400 mg, 3.0 mmol) was added in several portions (over 1 h) to a stirred solution of **6** (365 mg, 1.1 mmol) and **4** (400 mg, 1.1 mmol) in dry CH<sub>2</sub>Cl<sub>2</sub> (100 mL) at room temperature. The reaction mixture turned progressively dark green. After 12 h, H<sub>2</sub>O was added. The aqueous layer was extracted with CH<sub>2</sub>Cl<sub>2</sub> (3 x) and the combined organic layers dried (MgSO<sub>4</sub>), filtered and concentrated. Rapid filtration over SiO<sub>2</sub> (cyclohexane/CH<sub>2</sub>Cl<sub>2</sub> 1:1) to eliminate the polymers afforded a mixture of pillar[5]arene derivatives that was directly analyzed by MALDI-TOF mass spectrometry (Fig. S2).

**Preparation of compound 9.**

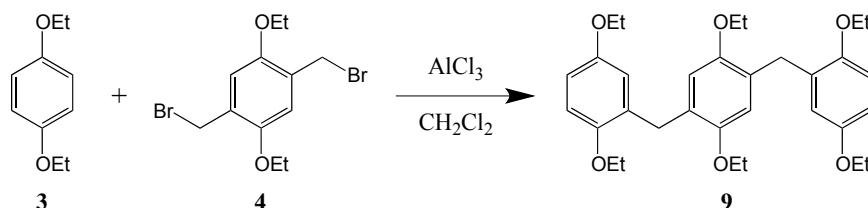

$\text{AlCl}_3$  (567 mg, 4.2 mmol) was added in several portions (over 1 h) to a stirred solution of **3** (2.36 g, 14.2 mmol) and **4** (500 mg, 1.4 mmol) in dry  $\text{CH}_2\text{Cl}_2$  (100 mL) at room temperature. After 12 h,  $\text{H}_2\text{O}$  was added. The aqueous layer was extracted with  $\text{CH}_2\text{Cl}_2$  (3 x) and the combined organic layers dried ( $\text{MgSO}_4$ ), filtered and concentrated. Two successive column chromatographic purifications ( $\text{SiO}_2$ , cyclohexane/ $\text{CH}_2\text{Cl}_2$  1:1) afforded compound **9** (358 mg, 48%) as a colorless solid.  $^1\text{H}$  NMR ( $\text{CDCl}_3$ , 300 MHz): 6.78-6.64 (m, 6 H), 4.00 (q,  $J = 7$  Hz, 4 H), 3.93 (q,  $J = 7$  Hz, 4 H), 3.92 (s, 4 H), 3.91 (q,  $J = 7$  Hz, 4 H), 1.40 (t,  $J = 7$  Hz, 6 H), 1.35 (t,  $J = 7$  Hz, 6 H), 1.33 (t,  $J = 7$  Hz, 6H). Elemental calcd. for  $\text{C}_{26}\text{H}_{42}\text{O}_6$ : C 73.53, H 8.10; found: C 73.49, H 8.19. MALDI-TOF MS: 522.2 ( $[\text{M}]^+$  calcd. for  $\text{C}_{26}\text{H}_{42}\text{O}_6$ : 522.297).

### Cyclization from compounds **9** and **10**.

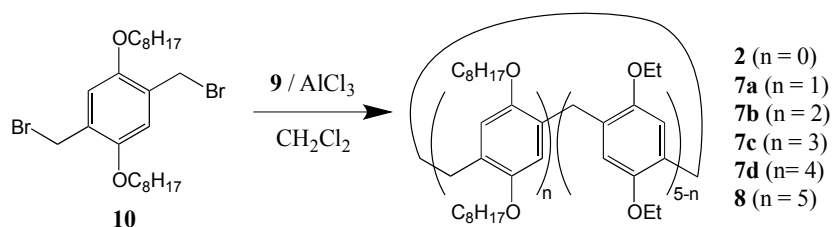

$\text{AlCl}_3$  (90 mg, 0.68 mmol) was added in several portions (over 1 h) to a stirred solution of **9** (130 mg, 0.25 mmol) and **10** (129 mg, 0.25 mmol) in dry  $\text{CH}_2\text{Cl}_2$  (45 mL) at room temperature. The reaction mixture turned progressively dark green. After 12 h,  $\text{H}_2\text{O}$  was added. The aqueous layer was extracted with  $\text{CH}_2\text{Cl}_2$  (3 x) and the combined organic layers dried ( $\text{MgSO}_4$ ), filtered and concentrated. Rapid filtration over  $\text{SiO}_2$  (cyclohexane/ $\text{CH}_2\text{Cl}_2$  1:1) to eliminate the polymers afforded a mixture of pillar[5]arene derivatives that was directly analyzed by MALDI-TOF mass spectrometry (Fig. S3).

### Cyclization from compound **9** and paraformaldehyde.

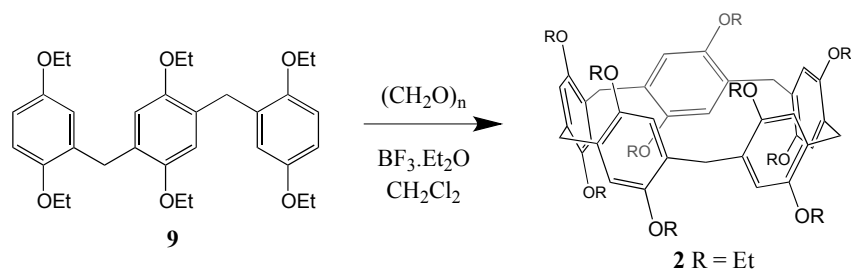

BF<sub>3</sub>.Et<sub>2</sub>O (40 μL, 0.3 mmol) was added to a stirred solution of **9** (150 mg, 0.3 mmol) and paraformaldehyde (26 mg, 0.9 mmol) in dry CH<sub>2</sub>Cl<sub>2</sub> (30 mL) at room temperature. After 3 h, H<sub>2</sub>O was added. The aqueous layer was extracted with CH<sub>2</sub>Cl<sub>2</sub> (3 x) and the combined organic layers dried (MgSO<sub>4</sub>), filtered and concentrated. Column chromatography (SiO<sub>2</sub>, cyclohexane/CH<sub>2</sub>Cl<sub>2</sub> 1:1) followed by recrystallization (CH<sub>3</sub>CN) gave **2** (40 mg, 20%). The analytical data were identical to those reported in the literature for compound **2**.<sup>[2]</sup>

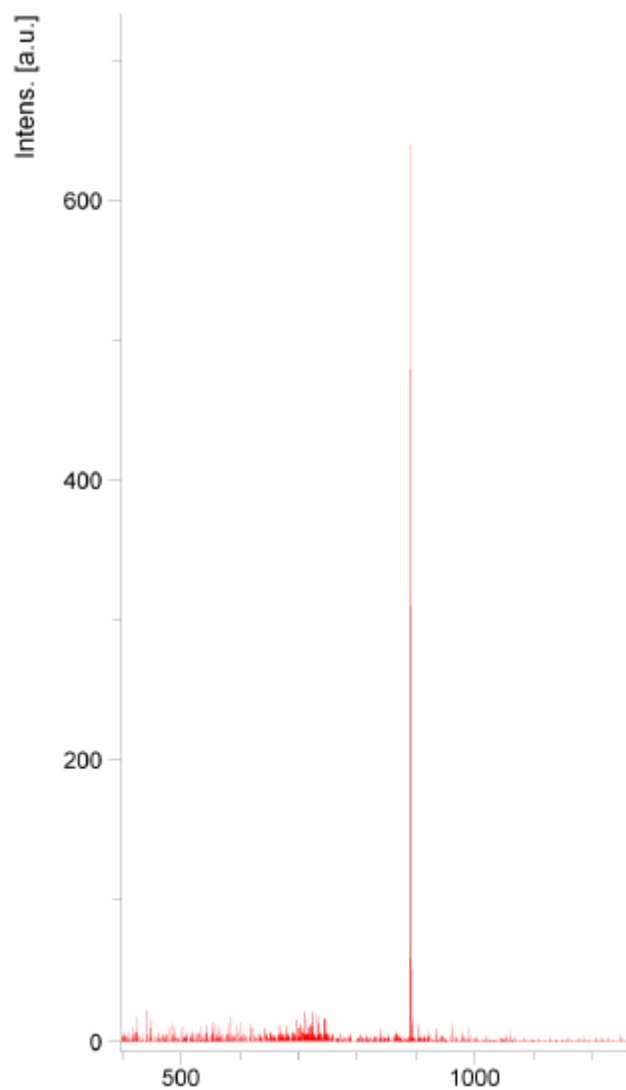

**Fig. S1.** MALDI-TOF MS of compound **2** obtained from the reaction of **3** and **4** with  $\text{AlCl}_3$  as a Lewis acid ( $[\text{M}]^+$  calcd. for  $(\text{C}_{11}\text{H}_{14}\text{O}_2)_5$ : 890.497; found: 890.4).



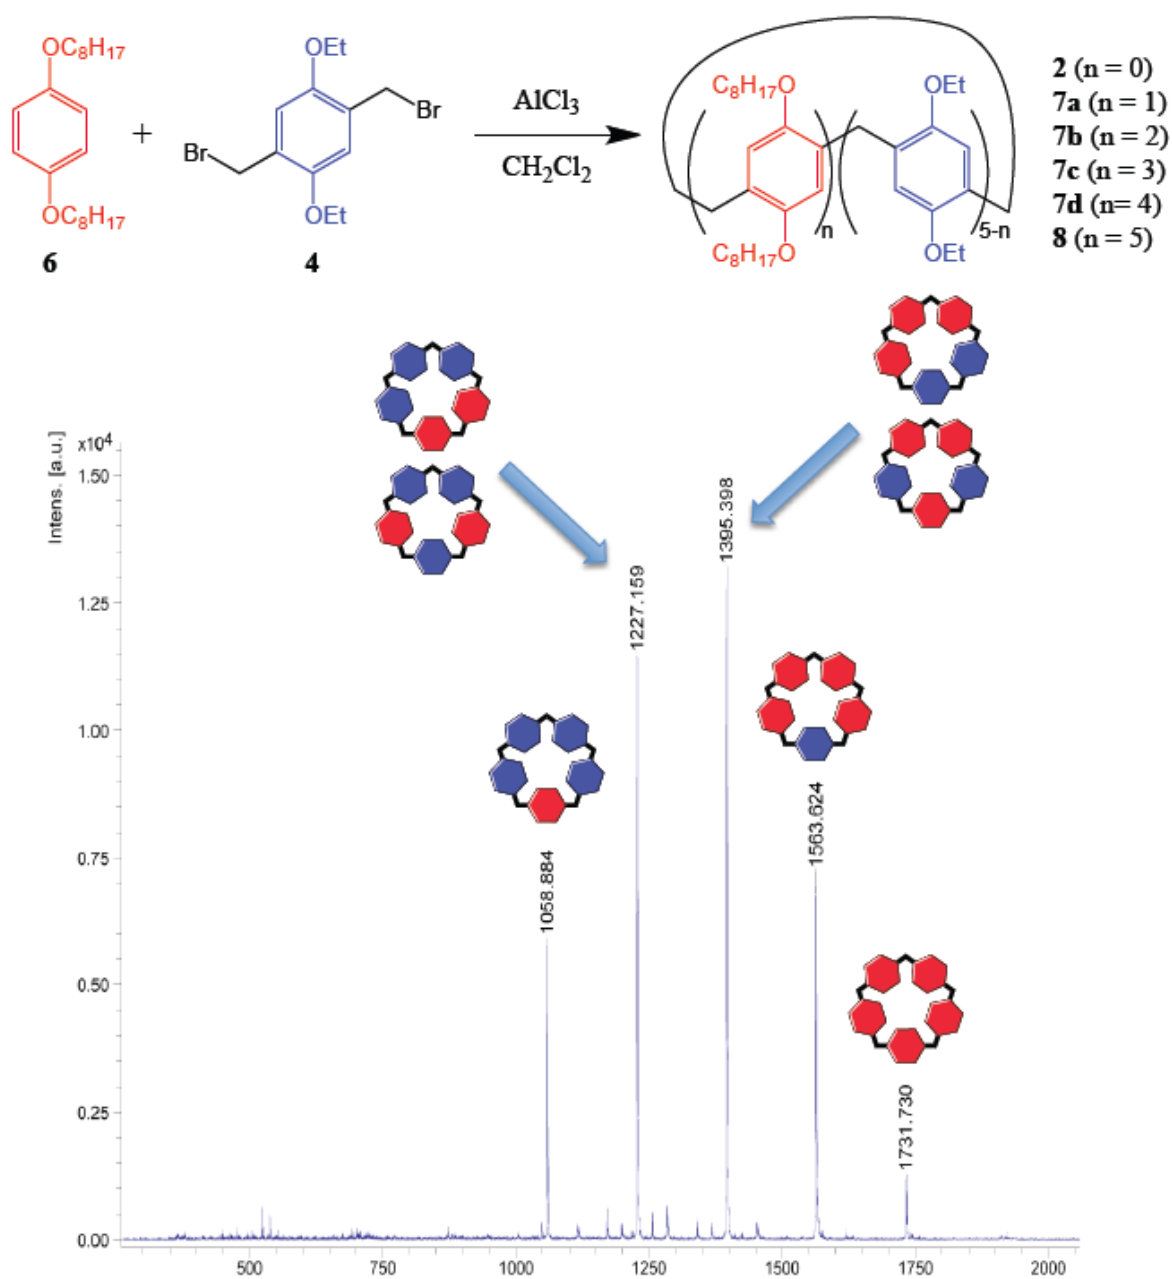

**Fig. S2.** MALDI-TOF MS of the mixture of pillar[5]arenes obtained from the reaction of 4 and 6 with  $\text{AlCl}_3$ . Out of all the possible cyclopentamers (2, 7a-d and 8), only compound 2 is not detected.

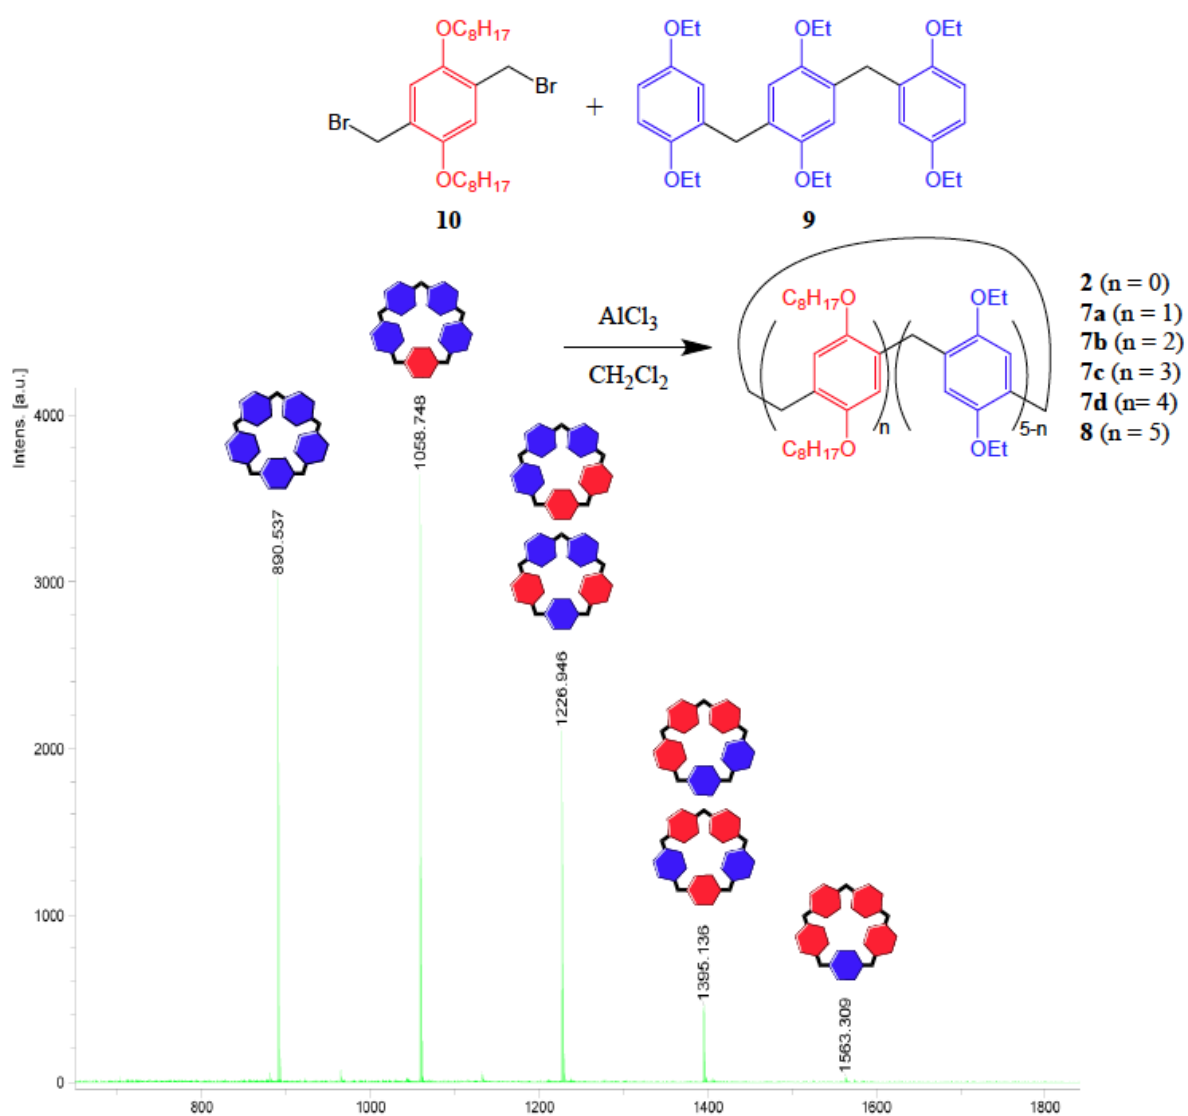

**Fig. S3.** MALDI-TOF MS of the mixture of pillar[5]arenes obtained from the reaction of **9** and **10** with  $\text{AlCl}_3$ . Out of all the possible cyclopentamers (**2**, **7a-d** and **8**), only compound **8** is not detected.
